# Supplementary material
Source: Copernicus journal article supplement (doi:10.5194/egusphere-2025-6297)
Supplement: Supplementary file 1 [file egusphere-2025-6297-supplement.pdf]

# **Supplement - Beyond behavioural models: equifinality and overparameterisation undermine confidence in predictions by soil organic matter models**

Marijn Van de Broek<sup>1</sup> and Johan Six<sup>1</sup>

<sup>1</sup>Department of Environmental Systems Science, ETH Zurich, Zurich, Switzerland

**Correspondence:** Marijn Van de Broek (Marijn.vandebroek@usys.ethz.ch)

## Supplementary information

### Contents

|                                 |          |
|---------------------------------|----------|
| <b>S1 Supplementary figures</b> | <b>2</b> |
| <b>S2 Supplementary tables</b>  | <b>5</b> |

## 5 S1 Supplementary figures

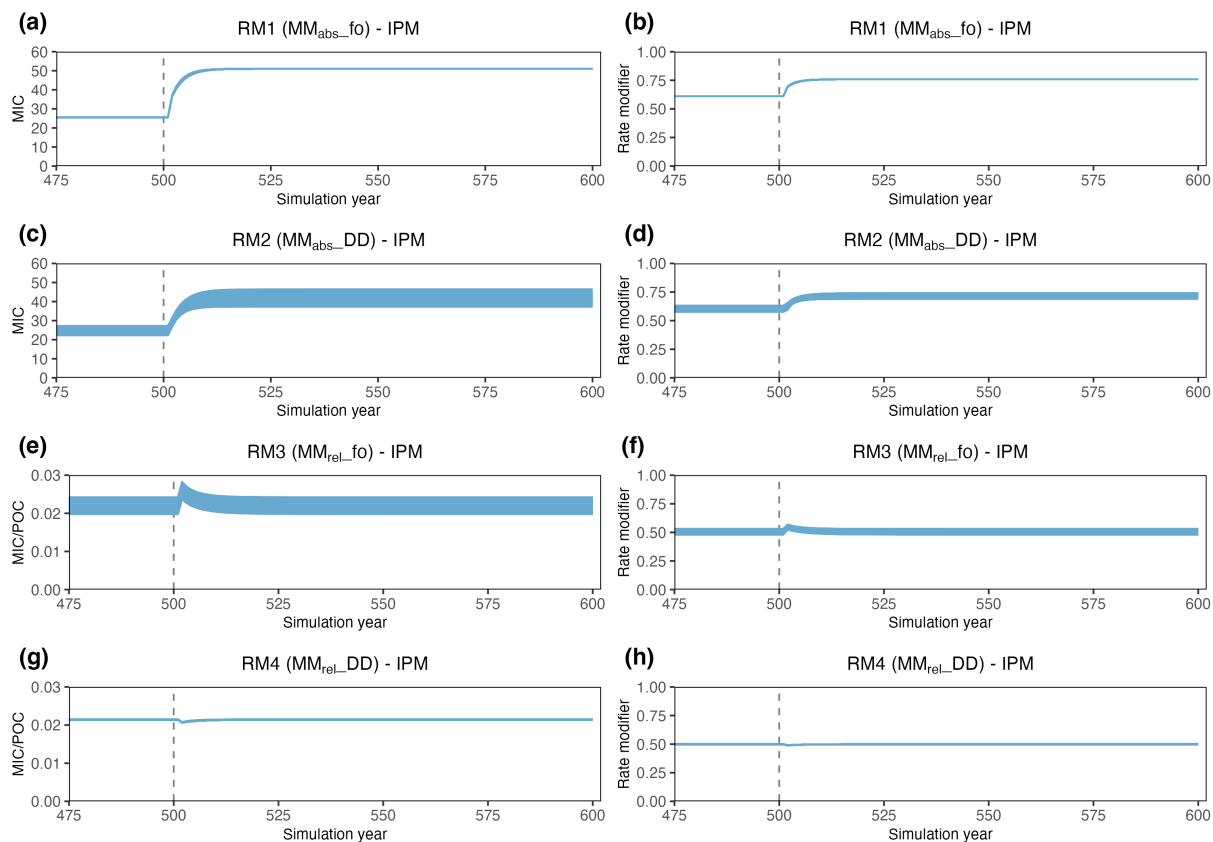

**Figure S1.** The effect of doubling OC inputs on changes in the rate modifiers for the depolymerisation of  $POC_{lit}$  in the rhizosphere models. Left column: model pools governing the magnitude of the rate modifiers ( $MIC$  for RM1 and RM2;  $MIC/POC$  for RM3 and RM4) before and after a doubling of OC inputs. Right column: changes in the value of the rate modifier before and after a doubling of OC inputs. The vertical dashed line at simulation year 500 shows from when the doubling of OC inputs took place.

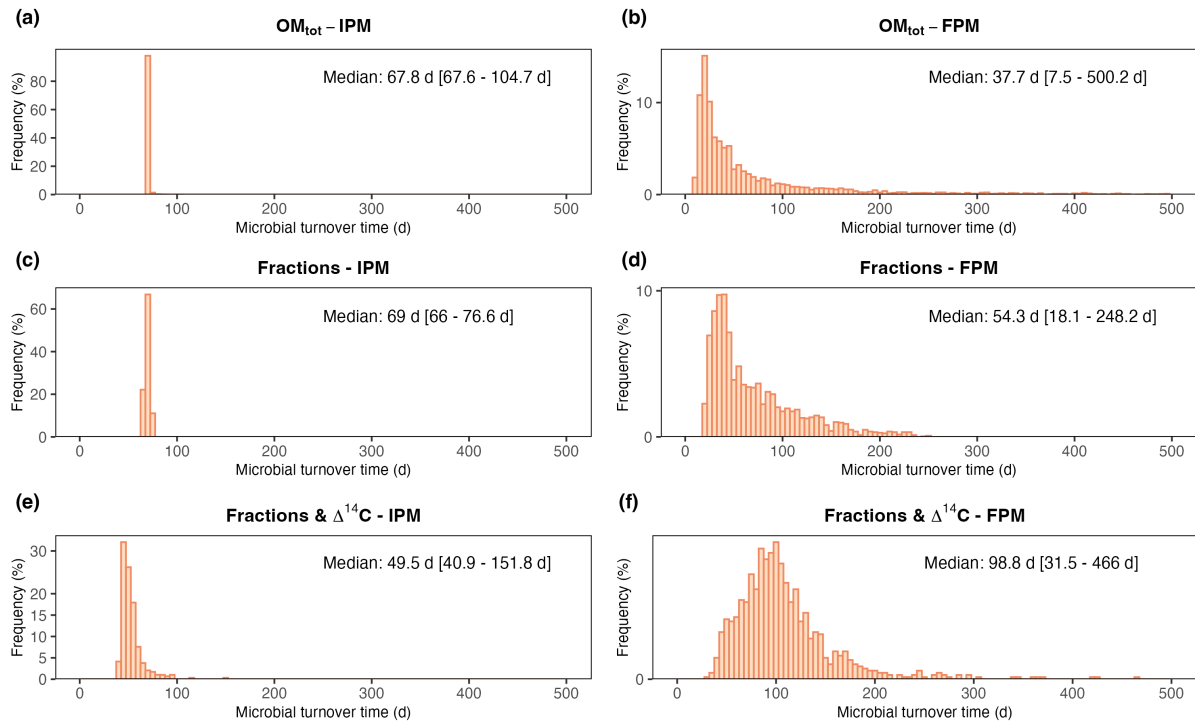

**Figure S2.** The simulated turnover time of the microbial biomass (in days) for the behavioural SOM models at steady state (i.e., the last year before OC inputs were doubled). The left column shows the results for the identifiable parameter models (IPM), while the right column shows the results for the full parameter model (FPM). The numbers between square brackets display the minimum and maximum values.

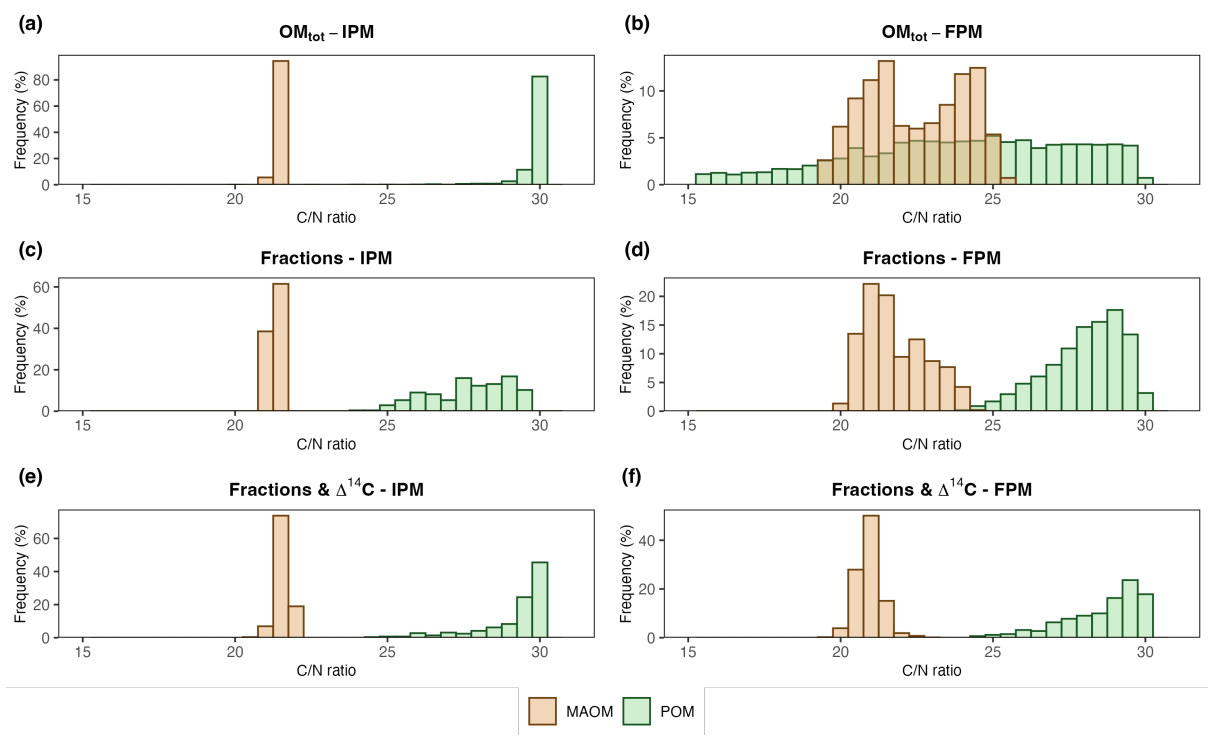

**Figure S3.** The simulated C/N ratio of particulate organic matter (POM) and mineral-associated organic matter (MAOM) for the behavioural SOM models at steady state (i.e., the last year before OC inputs were doubled). The calibration scenario *Fractions* and *Fractions and  $\Delta^{14}C$*  (second and third row) were calibrated using an assumed C/N ratio of 29 for POM, and 20 for MAOM. The left column shows the results for the identifiable parameter models (IPM), while the right column shows the results for the full parameter model (FPM).

## S2 Supplementary tables

**Table S1.** State variables of the rhizosphere models and their description. In the model, the pools are calculated down to 0.2 m depth for a unit surface area of 1 m<sup>2</sup>, hence the unit of all pools is gC m<sup>-2</sup> or gN m<sup>-2</sup>. Pools with an \* are simulated but are assumed to be in quasi steady-state (i.e., all mass entering those pools also leaves those pools within every time step), so their size is not kept track of.

| State variable | Description                                                                         |
|----------------|-------------------------------------------------------------------------------------|
| $POM_{res}$    | Particulate organic matter of microbial origin (death microbes and decayed enzymes) |
| $POM_{lit}$    | Particulate organic matter of plant origin (litter)                                 |
| $MIC$          | Microbial biomass                                                                   |
| $N_{min}$      | Mineral nitrogen in the soil solution                                               |
| $ENZ_{res}^*$  | Extracellular enzymes mediating the depolymerisation of $POM_{res}$                 |
| $ENZ_{li}^*$   | Extracellular enzymes mediating the depolymerisation of $POM_{lit}$                 |
| $DOM^*$        | Dissolved organic matter                                                            |

**Table S2.** Parameters used in the rhizosphere models, their description, unit, and value. In case the parameter was optimised using the differential evolution algorithm, this is indicated. The abbreviation RM refers to rhizosphere model. For a full description of the model parameters, reference is made to Wutzler et al. (2022).

| Parameter     | Description                                                                                 | Unit                             | Value            |
|---------------|---------------------------------------------------------------------------------------------|----------------------------------|------------------|
| $i_C$         | Inputs of organic carbon                                                                    | $\text{gC m}^{-2} \text{d}^{-1}$ | <i>Optimised</i> |
| $V_{max,res}$ | Maximum rate of $POM_{res}$ depolymerisation                                                | $\text{d}^{-1}$                  | <i>Optimised</i> |
| $V_{max,lit}$ | Maximum rate of $POM_{lit}$ depolymerisation                                                | $\text{d}^{-1}$                  | <i>Optimised</i> |
| $K_{mN}$      | Half-saturation constant for depolymerisation of $POM_{res}$ and $POM_{lit}$ in RM1 and RM2 | $\text{gC m}^{-3}$               | <i>Optimised</i> |
| $K_{mN,res}$  | Half-saturation constant for depolymerisation of $POM_{res}$ in RM3 and RM4                 | $\text{gC m}^{-3}$               | <i>Optimised</i> |
| $K_{mN,lit}$  | Half-saturation constant for depolymerisation of $POM_{lit}$ in RM3 and RM4                 | $\text{gC m}^{-3}$               | <i>Optimised</i> |
| $k_{mic,fo}$  | First-order mortality rate of microbes (RM1 and RM3)                                        | $\text{d}^{-1}$                  | 0.01             |
| $f_K$         | Carrying capacity of soil microbes, expressed as the portion of total POC (RM2 and RM4)     | Unitless                         | <i>Optimised</i> |
| $a_E$         | Enzyme production per unit of microbial biomass C                                           | $\text{d}^{-1}$                  | 0.002            |
| $m$           | Maintenance respiration as a portion of microbial biomass C                                 | $\text{d}^{-1}$                  | 0.02             |
| $CUE$         | Carbon use efficiency for microbial biomass and enzyme synthesis                            | Unitless                         | 0.5              |
| $CN_{mic}$    | C:N ratio of microbial biomass                                                              | Unitless                         | 10               |
| $CN_{enz}$    | C:N ratio of extracellular enzymes                                                          | Unitless                         | 3                |
| $CN_{lit}$    | C:N ratio plant litter                                                                      | Unitless                         | 30               |
| $k_E$         | Portion of decayed enzymes being transferred to $DOM$                                       | Unitless                         | 0.8              |
| $e_{ivr}$     | Portion of death microbes that is not transformed to $\text{CO}_2$ by grazers               | $\text{d}^{-1}$                  | 0.45             |
| $\nu_N$       | Nitrogen use efficiency                                                                     | Unitless                         | 0.9              |
| $i_{BN}$      | Maximum portion of $N_{min}$ that can be taken up by microbes in one time step              | $\text{d}^{-1}$                  | 0.01             |
| $l_N$         | Portion of leached $N_{min}$                                                                | $\text{d}^{-1}$                  | 0.01             |
| $f_{rhizo}$   | Portion of inputs as rhizodeposits                                                          | Unitless                         | 0.2              |
| $sc$          | Combined silt and clay content                                                              | Unitless                         | 0.5              |

**Table S3.** State variables used in the SOM model and their description. In the model, the pools are calculated down to 0.2 m depth for a unit surface area of 1 m<sup>2</sup>, hence the unit of all pools is gC m<sup>-2</sup> or gN m<sup>-2</sup>. Pools with an \* are simulated but are assumed to be in quasi steady-state (i.e., all mass entering those pools also leaves those pools within every time step), so their size is not kept track of. For every pool containing C, an additional pool keeps track of the <sup>14</sup>C content of that pool. The latter are not shown in this table.

| State variable | Description                                                                         |
|----------------|-------------------------------------------------------------------------------------|
| $POM_{res}$    | Particulate organic matter of microbial origin (death microbes and decayed enzymes) |
| $POM_{lit}$    | Particulate organic matter of plant origin (litter)                                 |
| $MIC$          | Microbial biomass                                                                   |
| $N_{min}$      | Mineral nitrogen in the soil solution                                               |
| $MAOM$         | Mineral-associated organic matter                                                   |
| $ENZ_{res}^*$  | Extracellular enzymes mediating the depolymerisation of $POM_{res}$                 |
| $ENZ_{lit}^*$  | Extracellular enzymes mediating the depolymerisation of $POM_{lit}$                 |
| $DOM$          | Dissolved organic matter                                                            |

**Table S4.** Parameters used in the SOM model, their description, unit, and value. In case the parameter was optimised using the differential evolution algorithm, this is indicated. For a full description of the model parameters, reference is made to Wutzler et al. (2022).

| Parameter                     | Description                                                                   | Unit                             | Value            |
|-------------------------------|-------------------------------------------------------------------------------|----------------------------------|------------------|
| $i_C$                         | Inputs of organic carbon                                                      | $\text{gC m}^{-2} \text{d}^{-1}$ | <i>Optimised</i> |
| $V_{max,res}$                 | Maximum rate of $POM_{res}$ depolymerisation                                  | $\text{d}^{-1}$                  | <i>Optimised</i> |
| $V_{max,lit}$                 | Maximum rate of $POM_{lit}$ depolymerisation                                  | $\text{d}^{-1}$                  | <i>Optimised</i> |
| $K_{mN,res}$                  | Half-saturation constant for depolymerisation of $POM_{res}$                  | $\text{gC m}^{-3}$               | <i>Optimised</i> |
| $K_{mN,lit}$                  | Half-saturation constant for depolymerisation of $POM_{lit}$                  | $\text{gC m}^{-3}$               | <i>Optimised</i> |
| $f_K$                         | Carrying capacity of soil microbes, expressed as the portion of total POC     | Unitless                         | <i>Optimised</i> |
| $K_{m,U}$                     | Affinity constant for the uptake of DOM by microbes                           | $\text{gC m}^{-3}$               | <i>Optimised</i> |
| $K_{m,ads}$                   | Affinity constant for the adsorption of DOM by minerals                       | $\text{gC m}^{-3}$               | <i>Optimised</i> |
| $k_{des}$                     | Rate of organic matter desorption from minerals                               | $\text{d}^{-1}$                  | <i>Optimised</i> |
| $a_E$                         | Enzyme production per unit of microbial biomass C                             | $\text{d}^{-1}$                  | 0.002            |
| $m$                           | Maintenance respiration as a portion of microbial biomass C                   | $\text{d}^{-1}$                  | 0.02             |
| $CUE$                         | Carbon use efficiency for microbial biomass and enzyme synthesis              | Unitless                         | 0.5              |
| $CN_{mic}$                    | C:N ratio of microbial biomass                                                | Unitless                         | 10               |
| $CN_{enz}$                    | C:N ratio of extracellular enzymes                                            | Unitless                         | 3                |
| $CN_{lit}$                    | C:N ratio plant litter                                                        | Unitless                         | 30               |
| $k_E$                         | Portion of decayed enzymes being transferred to $DOM$                         | Unitless                         | 0.8              |
| $e_{ivr}$                     | Portion of death microbes that is not transformed to $\text{CO}_2$ by grazers | $\text{d}^{-1}$                  | 0.45             |
| $\nu_N$                       | Nitrogen use efficiency                                                       | Unitless                         | 0.9              |
| $i_{BN}$                      | Maximum portion of $N_{min}$ that can be taken up by microbes                 | $\text{d}^{-1}$                  | 0.01             |
| $l_N$                         | Portion of leached $N_{min}$                                                  | $\text{d}^{-1}$                  | 0.01             |
| $f_{rhizo}$                   | Fraction of inputs as rhizodeposits                                           | Unitless                         | 0.2              |
| $V_{rhizo}$                   | Volume of the rhizosphere, expressed as a portion of total soil volume        | Unitless                         | 0.1              |
| $sc$                          | Combined silt and clay content                                                | Unitless                         | 0.5              |
| $\delta^{13}\text{C}_{input}$ | $\delta^{13}\text{C}$ value of input OC                                       | $\text{‰}$                       | -28              |

**Table S5.** Parameters of the rhizosphere models (RM1 to RM4) optimized during the differential evolution calibration, and the ranges over which parameter values were tested (min and max). The same ranges were used for the parameter optimisation using the Bayesian calibration. Note that in models RM1 and RM2,  $K_{mN}$  is the half-rate constant for the absolute variant of the Michaelis-Menten equations, while in RM3 and RM4,  $K_{mN,res}$  and  $K_{mN,lit}$  are the half-rate constants for the relative variants.

|               | RM1.min            | RM1.max            | RM2.min            | RM2.max            | RM3.min            | RM3.max            | RM4.min            | RM4.max            |
|---------------|--------------------|--------------------|--------------------|--------------------|--------------------|--------------------|--------------------|--------------------|
| $V_{max,res}$ | $1 \times 10^{-5}$ | $1 \times 10^{-1}$ |
| $V_{max,lit}$ | $1 \times 10^{-5}$ | $1 \times 10^{-1}$ |
| $K_{mN}$      | $1 \times 10^{-6}$ | $1 \times 10^1$    | $1 \times 10^{-6}$ | $1 \times 10^1$    | -                  | -                  | -                  | -                  |
| $K_{mN,res}$  | -                  | -                  | -                  | -                  | $1 \times 10^{-6}$ | $1 \times 10^{-2}$ | $1 \times 10^{-6}$ | $1 \times 10^{-2}$ |
| $K_{mN,lit}$  | -                  | -                  | -                  | -                  | $1 \times 10^{-6}$ | $1 \times 10^{-2}$ | $1 \times 10^{-6}$ | $1 \times 10^{-2}$ |
| $f_K$         | -                  | -                  | $1 \times 10^{-4}$ | $1 \times 5^{-2}$  | -                  | -                  | $1 \times 10^{-4}$ | $1 \times 5^{-2}$  |

**Table S6.** Ranges over which parameters of the SOM model were allowed to vary during the differential evolution (DE) and Bayesian calibration.  $i_C$  is the annual C input to the soil.

|               | DE.min                | DE.max                | Bayesian.min          | Bayesian.max          |
|---------------|-----------------------|-----------------------|-----------------------|-----------------------|
| $V_{max,res}$ | $9.13 \times 10^{-4}$ | $2.74 \times 10^{-1}$ | $1.37 \times 10^{-3}$ | $2.74 \times 10^{-1}$ |
| $V_{max,lit}$ | $2.74 \times 10^{-4}$ | $5.48 \times 10^{-3}$ | $9.13 \times 10^{-4}$ | $9.13 \times 10^{-3}$ |
| $K_{mN,res}$  | $1 \times 10^{-6}$    | $1 \times 10^{-3}$    | $9.67 \times 10^{-6}$ | $8.61 \times 10^{-3}$ |
| $K_{mN,lit}$  | $1 \times 10^{-6}$    | $3.9 \times 10^{-3}$  | $9.17 \times 10^{-6}$ | $8.18 \times 10^{-3}$ |
| $K_{m,U}$     | $1 \times 10^{-1}$    | $1 \times 10^1$       | $1 \times 10^{-1}$    | $1 \times 10^1$       |
| $K_{m,ads}$   | 1                     | $1 \times 10^3$       | 1                     | $1 \times 10^3$       |
| $k_{des}$     | $6.85 \times 10^{-6}$ | $5.48 \times 10^{-4}$ | $7.83 \times 10^{-6}$ | $5.48 \times 10^{-4}$ |
| $f_K$         | $1 \times 10^{-4}$    | $5 \times 10^{-2}$    | $1 \times 10^{-3}$    | $5 \times 10^{-2}$    |
| $i_C$         | 50                    | 350                   | -                     | -                     |

**Table S7.** Optimised parameter values for the rhizosphere models, using the differential evolution algorithm.

| Parameter     | RM1                    | RM2                    | RM3                    | RM4                    |
|---------------|------------------------|------------------------|------------------------|------------------------|
| $V_{max,res}$ | $1.00 \times 10^{-1}$  | $1.00 \times 10^{-1}$  | $1.00 \times 10^{-1}$  | $9.998 \times 10^{-2}$ |
| $V_{max,lit}$ | $1.049 \times 10^{-3}$ | $1.051 \times 10^{-3}$ | $1.282 \times 10^{-3}$ | $1.282 \times 10^{-3}$ |
| $K_{mN}$      | $1.154 \times 10^{-1}$ | $1.143 \times 10^{-1}$ | -                      | -                      |
| $K_{mN,res}$  | -                      | -                      | $3.706 \times 10^{-4}$ | $3.705 \times 10^{-4}$ |
| $K_{mN,lit}$  | -                      | -                      | $4.196 \times 10^{-5}$ | $4.196 \times 10^{-5}$ |
| $f_K$         | -                      | $2.108 \times 10^{-2}$ | -                      | $2.132 \times 10^{-2}$ |

**Table S8.** Optimised parameter values for the SOM model, using the differential evolution algorithm.

| Parameter     | Optimised value        |
|---------------|------------------------|
| $V_{max,res}$ | $3.170 \times 10^{-2}$ |
| $V_{max,lit}$ | $1.389 \times 10^{-3}$ |
| $K_{mN,res}$  | $2.134 \times 10^{-4}$ |
| $K_{mN,lit}$  | $4.358 \times 10^{-5}$ |
| $K_{m,U}$     | 1.200                  |
| $K_{m,ads}$   | $7.875 \times 10^2$    |
| $k_{des}$     | $1.303 \times 10^{-5}$ |
| $f_K$         | $2.294 \times 10^{-2}$ |
| $i_C$         | $3.490 \times 10^2$    |

**Table S9.** Parameter importance for the simulation of total SOC of the variables of the rhizosphere models, quantified using the  $\delta^{msqr}$  measure from Brun et al. (2001), calculated around the size of the parameter values at steady state. These are the parameters that were optimised during the Bayesian calibration for the *full parameter model (FPM)* scenario.

|               | Model 1 | Model 2 | Model 3 | model 4 |
|---------------|---------|---------|---------|---------|
| $V_{max,res}$ | 0.0026  | 0.0019  | 0.0146  | 0.0074  |
| $V_{max,lit}$ | 0.98    | 0.68    | 1.94    | 0.98    |
| $K_{mN}$      | 0.38    | 0.27    | -       | -       |
| $K_{mN,res}$  | -       | -       | 0.0073  | 0.0037  |
| $K_{mN,lit}$  | -       | -       | 0.97    | 0.49    |
| $k_{mic,fo}$  | 0.18    | -       | 0.41    | -       |
| $f_K$         | -       | 0.29    | -       | 0.49    |
| $CUE$         | 0.19    | 0.06    | 0.60    | 0.01    |

**Table S10.** Parameter importance for the simulation of total SOC of the variables of the full SOM model, quantified using the  $\delta^{\text{msqr}}$  measure from Brun et al. (2001), calculated around the size of the parameter values at steady state. These are the parameters that were optimised during the Bayesian calibration for the *full parameter model (FPM)* scenario.

|               | $\delta^{\text{msqr}}$ |
|---------------|------------------------|
| $V_{max,res}$ | 0.00044                |
| $V_{max,lit}$ | 0.10                   |
| $K_{mN,res}$  | 0.00023                |
| $K_{mN,lit}$  | 0.049                  |
| $f_K$         | 0.19                   |
| $K_{m,U}$     | 0.48                   |
| $K_{m,ads}$   | 0.82                   |
| $k_{des}$     | 0.69                   |

**Table S11.** Identifiable parameter combinations in rhizosphere model 1 (with a collinearity index < 10), for a calibration when data on total SOC and the CN is available. For each row, identifiable parameter combinations are marked with an 'X'. N is the number of identifiable parameters in the same row. Note that parameter combinations which are not identifiable are not shown.

| N    | Vmax.L | Vmax.R | KmN | k.mic | CUE | collinearity |
|------|--------|--------|-----|-------|-----|--------------|
| 2.00 | X      | X      |     |       |     | 1.23         |
| 2.00 |        | X      | X   |       |     | 1.24         |
| 2.00 |        | X      |     | X     |     | 1.17         |
| 2.00 |        | X      |     |       | X   | 1.13         |
| 2.00 |        |        | X   |       | X   | 9.86         |

**Table S12.** Identifiable parameter combinations in rhizosphere model 1 (with a collinearity index < 10), for a calibration when data on total POC, MIC and the CN of total SOC is available. For each row, identifiable parameter combinations are marked with an 'X'. N is the number of identifiable parameters in the same row. Note that parameter combinations which are not identifiable are not shown.

| N    | Vmax.L | Vmax.R | KmN | k.mic | CUE | collinearity |
|------|--------|--------|-----|-------|-----|--------------|
| 2.00 | X      | X      |     |       |     | 1.24         |
| 2.00 | X      |        |     | X     |     | 1.31         |
| 2.00 | X      |        |     |       | X   | 1.21         |
| 2.00 |        | X      | X   |       |     | 1.25         |
| 2.00 |        | X      |     | X     |     | 1.07         |
| 2.00 |        | X      |     |       | X   | 1.04         |
| 2.00 |        |        | X   | X     |     | 1.31         |
| 2.00 |        |        | X   |       | X   | 1.21         |
| 3.00 | X      | X      |     | X     |     | 1.40         |
| 3.00 | X      | X      |     |       | X   | 1.33         |
| 3.00 |        | X      | X   | X     |     | 1.41         |
| 3.00 |        | X      | X   |       | X   | 1.34         |

**Table S13.** Identifiable parameter combinations in rhizosphere model 2 (with a collinearity index < 10), for a calibration when data on total SOC and the CN is available. For each row, identifiable parameter combinations are marked with an 'X'. N is the number of identifiable parameters in the same row. Note that parameter combinations which are not identifiable are not shown.

| N    | Vmax.L | Vmax.R | KmN | k.mic | CUE | collinearity |
|------|--------|--------|-----|-------|-----|--------------|
| 2.00 | X      | X      |     |       |     | 1.17         |
| 2.00 |        | X      | X   |       |     | 1.18         |
| 2.00 |        | X      |     | X     |     | 1.09         |
| 2.00 |        | X      |     |       | X   | 1.24         |
| 2.00 |        |        |     | X     | X   | 7.10         |

**Table S14.** Identifiable parameter combinations in rhizosphere model 2 (with a collinearity index < 10), for a calibration when data on total POC, MIC and the CN of total SOC is available. For each row, identifiable parameter combinations are marked with an 'X'. N is the number of identifiable parameters in the same row. Note that parameter combinations which are not identifiable are not shown.

| N    | Vmax.L | Vmax.R | KmN | k.mic | CUE | collinearity |
|------|--------|--------|-----|-------|-----|--------------|
| 2.00 | X      | X      |     |       |     | 1.26         |
| 2.00 | X      |        |     | X     |     | 1.24         |
| 2.00 |        | X      | X   |       |     | 1.27         |
| 2.00 |        | X      |     | X     |     | 1.10         |
| 2.00 |        | X      |     |       | X   | 1.32         |
| 2.00 |        |        | X   | X     |     | 1.24         |
| 2.00 |        |        |     | X     | X   | 1.24         |
| 3.00 | X      | X      |     | X     |     | 1.32         |
| 3.00 |        | X      | X   | X     |     | 1.33         |
| 3.00 |        | X      |     | X     | X   | 1.38         |

**Table S15.** Identifiable parameter combinations in rhizosphere model 3 (with a collinearity index < 10), for a calibration when data on total SOC and the CN is available. For each row, identifiable parameter combinations are marked with an 'X'. N is the number of identifiable parameters in the same row. Note that parameter combinations which are not identifiable are not shown.

| N    | Vmax.L | Vmax.R | KmN.L | KmN.R | k.mic | CUE | collinearity |
|------|--------|--------|-------|-------|-------|-----|--------------|
| 2.00 | X      | X      |       |       |       |     | 3.24         |
| 2.00 | X      |        |       | X     |       |     | 3.24         |
| 2.00 |        | X      | X     |       |       |     | 3.24         |
| 2.00 |        | X      |       |       | X     |     | 3.02         |
| 2.00 |        | X      |       |       |       | X   | 2.95         |
| 2.00 |        |        | X     | X     |       |     | 3.24         |
| 2.00 |        |        |       | X     | X     |     | 3.02         |
| 2.00 |        |        |       | X     |       | X   | 2.95         |

**Table S16.** Identifiable parameter combinations in rhizosphere model 3 (with a collinearity index < 10), for a calibration when data on total POC, MIC and the CN of total SOC is available. For each row, identifiable parameter combinations are marked with an 'X'. N is the number of identifiable parameters in the same row. Note that parameter combinations which are not identifiable are not shown.

| N    | Vmax.L | Vmax.R | KmN.L | KmN.R | k.mic | CUE | collinearity |
|------|--------|--------|-------|-------|-------|-----|--------------|
| 2.00 | X      | X      |       |       |       |     | 3.30         |
| 2.00 | X      |        |       | X     |       |     | 3.30         |
| 2.00 | X      |        |       |       | X     |     | 1.88         |
| 2.00 | X      |        |       |       |       | X   | 1.83         |
| 2.00 |        | X      | X     |       |       |     | 3.30         |
| 2.00 |        | X      |       |       | X     |     | 1.67         |
| 2.00 |        | X      |       |       |       | X   | 1.63         |
| 2.00 |        |        | X     | X     |       |     | 3.30         |
| 2.00 |        |        | X     |       | X     |     | 1.88         |
| 2.00 |        |        | X     |       |       | X   | 1.83         |
| 2.00 |        |        |       | X     | X     |     | 1.67         |
| 2.00 |        |        |       | X     |       | X   | 1.63         |
| 3.00 | X      | X      |       |       | X     |     | 3.43         |
| 3.00 | X      | X      |       |       |       | X   | 3.43         |
| 3.00 | X      |        |       | X     | X     |     | 3.43         |
| 3.00 | X      |        |       | X     |       | X   | 3.43         |
| 3.00 |        | X      | X     |       | X     |     | 3.43         |
| 3.00 |        | X      | X     |       |       | X   | 3.43         |
| 3.00 |        |        | X     | X     | X     |     | 3.43         |
| 3.00 |        |        | X     | X     |       | X   | 3.43         |

**Table S17.** Identifiable parameter combinations in rhizosphere model 4 (with a collinearity index < 10), for a calibration when data on total SOC and the CN is available. For each row, identifiable parameter combinations are marked with an 'X'. N is the number of identifiable parameters in the same row. Note that parameter combinations which are not identifiable are not shown.

| <b>N</b> | <b>Vmax.L</b> | <b>Vmax.R</b> | <b>KmN.L</b> | <b>KmN.R</b> | <b>fK</b> | <b>CUE</b> | <b>collinearity</b> |
|----------|---------------|---------------|--------------|--------------|-----------|------------|---------------------|
| 2.00     | X             | X             |              |              |           |            | 1.94                |
| 2.00     | X             |               |              | X            |           |            | 1.94                |
| 2.00     | X             |               |              |              |           | X          | 3.75                |
| 2.00     |               | X             | X            |              |           |            | 1.94                |
| 2.00     |               | X             |              |              | X         |            | 1.79                |
| 2.00     |               | X             |              |              |           | X          | 3.87                |
| 2.00     |               |               | X            | X            |           |            | 1.94                |
| 2.00     |               |               | X            |              |           | X          | 3.75                |
| 2.00     |               |               |              | X            | X         |            | 1.79                |
| 2.00     |               |               |              | X            |           | X          | 3.87                |
| 2.00     |               |               |              |              | X         | X          | 3.20                |

**Table S18.** Identifiable parameter combinations in rhizosphere model 4 (with a collinearity index < 10), for a calibration when data on total POC, MIC and the CN of total SOC is available. For each row, identifiable parameter combinations are marked with an 'X'. N is the number of identifiable parameters in the same row. Note that parameter combinations which are not identifiable are not shown.

| N    | Vmax.L | Vmax.R | KmN.L | KmN.R | fK | CUE | collinearity |
|------|--------|--------|-------|-------|----|-----|--------------|
| 2.00 | X      | X      |       |       |    |     | 2.48         |
| 2.00 | X      |        |       | X     |    |     | 2.48         |
| 2.00 | X      |        |       |       | X  |     | 1.01         |
| 2.00 | X      |        |       |       |    | X   | 5.17         |
| 2.00 |        | X      | X     |       |    |     | 2.48         |
| 2.00 |        | X      |       |       | X  |     | 1.01         |
| 2.00 |        | X      |       |       |    | X   | 4.69         |
| 2.00 |        |        | X     | X     |    |     | 2.48         |
| 2.00 |        |        | X     |       | X  |     | 1.01         |
| 2.00 |        |        | X     |       |    | X   | 5.17         |
| 2.00 |        |        |       | X     | X  |     | 1.01         |
| 2.00 |        |        |       | X     |    | X   | 4.68         |
| 2.00 |        |        |       |       | X  | X   | 1.00         |
| 3.00 | X      | X      |       |       | X  |     | 2.49         |
| 3.00 | X      |        |       | X     | X  |     | 2.49         |
| 3.00 | X      |        |       |       | X  | X   | 5.18         |
| 3.00 |        | X      | X     |       | X  |     | 2.49         |
| 3.00 |        | X      |       |       | X  | X   | 4.69         |
| 3.00 |        |        | X     | X     | X  |     | 2.49         |
| 3.00 |        |        | X     |       | X  | X   | 5.18         |
| 3.00 |        |        |       | X     | X  | X   | 4.69         |

Table S19: Identifiable parameter combinations in the full SOM model (with a collinearity index < 10), for a calibration when only data on total SOC and N is available. For each row, identifiable parameter combinations are marked with an 'X'. N is the number of identifiable parameters in the same row. Note that parameter combinations which are not identifiable are not shown.

| <b>N</b> | <b>Vmax.L</b> | <b>Vmax.R</b> | <b>KmN.L</b> | <b>KmN.R</b> | <b>KmU</b> | <b>KmAds</b> | <b>kdes</b> | <b>fK</b> | <b>collinearity</b> |
|----------|---------------|---------------|--------------|--------------|------------|--------------|-------------|-----------|---------------------|
| 2.00     | X             | X             |              |              |            |              |             |           | 2.33                |
| 2.00     | X             |               |              | X            |            |              |             |           | 2.33                |
| 2.00     |               | X             | X            |              |            |              |             |           | 2.33                |
| 2.00     |               | X             |              |              | X          |              |             |           | 2.23                |
| 2.00     |               | X             |              |              |            | X            |             |           | 2.23                |
| 2.00     |               | X             |              |              |            |              | X           |           | 2.23                |
| 2.00     |               | X             |              |              |            |              |             | X         | 2.68                |
| 2.00     |               |               | X            | X            |            |              |             |           | 2.33                |
| 2.00     |               |               |              | X            | X          |              |             |           | 2.23                |
| 2.00     |               |               |              | X            |            | X            |             |           | 2.23                |
| 2.00     |               |               |              | X            |            |              | X           |           | 2.23                |
| 2.00     |               |               |              | X            |            |              |             | X         | 2.68                |

Table S20: Identifiable parameter combinations in the full SOM model (with a collinearity index < 10), for a calibration when data on the OC and N content of POM and MAOM are available. For each row, identifiable parameter combinations are marked with an 'X'. N is the number of identifiable parameters in the same row. Note that parameter combinations which are not identifiable are not shown.

| N    | Vmax.L | Vmax.R | KmN.L | KmN.R | KmU | KmAds | kdes | fK | collinearity |
|------|--------|--------|-------|-------|-----|-------|------|----|--------------|
| 2.00 | X      | X      |       |       |     |       |      |    | 3.06         |
| 2.00 | X      |        |       | X     |     |       |      |    | 3.06         |
| 2.00 | X      |        |       |       | X   |       |      |    | 1.53         |
| 2.00 | X      |        |       |       |     | X     |      |    | 1.53         |
| 2.00 | X      |        |       |       |     |       | X    |    | 1.53         |
| 2.00 | X      |        |       |       |     |       |      | X  | 1.25         |
| 2.00 |        | X      | X     |       |     |       |      |    | 3.06         |
| 2.00 |        | X      |       |       | X   |       |      |    | 1.23         |
| 2.00 |        | X      |       |       |     | X     |      |    | 1.23         |
| 2.00 |        | X      |       |       |     |       | X    |    | 1.23         |
| 2.00 |        | X      |       |       |     |       |      | X  | 1.46         |
| 2.00 |        |        | X     | X     |     |       |      |    | 3.06         |
| 2.00 |        |        | X     |       | X   |       |      |    | 1.53         |
| 2.00 |        |        | X     |       |     | X     |      |    | 1.53         |
| 2.00 |        |        | X     |       |     |       | X    |    | 1.53         |
| 2.00 |        |        | X     |       |     |       |      | X  | 1.25         |
| 2.00 |        |        |       | X     | X   |       |      |    | 1.23         |
| 2.00 |        |        |       | X     |     | X     |      |    | 1.23         |
| 2.00 |        |        |       | X     |     |       | X    |    | 1.23         |
| 2.00 |        |        |       | X     |     |       |      | X  | 1.46         |
| 2.00 |        |        |       |       | X   |       |      | X  | 1.50         |
| 2.00 |        |        |       |       |     | X     |      | X  | 1.50         |
| 2.00 |        |        |       |       |     |       | X    | X  | 1.50         |
| 3.00 | X      | X      |       |       | X   |       |      |    | 3.88         |
| 3.00 | X      | X      |       |       |     | X     |      |    | 3.88         |
| 3.00 | X      | X      |       |       |     |       | X    |    | 3.88         |
| 3.00 | X      | X      |       |       |     |       |      | X  | 3.43         |
| 3.00 | X      |        |       | X     | X   |       |      |    | 3.88         |
| 3.00 | X      |        |       | X     |     | X     |      |    | 3.88         |

Table S20: continued

| N    | Vmax.L | Vmax.R | KmN.L | KmN.R | KmU | KmAds | kdes | fK | collinearity |
|------|--------|--------|-------|-------|-----|-------|------|----|--------------|
| 3.00 | X      |        |       | X     |     |       | X    |    | 3.88         |
| 3.00 | X      |        |       | X     |     |       |      | X  | 3.43         |
| 3.00 |        | X      | X     |       | X   |       |      |    | 3.88         |
| 3.00 |        | X      | X     |       |     | X     |      |    | 3.88         |
| 3.00 |        | X      | X     |       |     |       | X    |    | 3.88         |
| 3.00 |        | X      | X     |       |     |       |      | X  | 3.43         |
| 3.00 |        | X      |       |       | X   |       |      | X  | 4.68         |
| 3.00 |        | X      |       |       |     | X     |      | X  | 4.68         |
| 3.00 |        | X      |       |       |     |       | X    | X  | 4.68         |
| 3.00 |        |        | X     | X     | X   |       |      |    | 3.88         |
| 3.00 |        |        | X     | X     |     | X     |      |    | 3.88         |
| 3.00 |        |        | X     | X     |     |       | X    |    | 3.88         |
| 3.00 |        |        | X     | X     |     |       |      | X  | 3.43         |
| 3.00 |        |        |       | X     | X   |       |      | X  | 4.68         |
| 3.00 |        |        |       | X     |     | X     |      | X  | 4.68         |
| 3.00 |        |        |       | X     |     |       | X    | X  | 4.68         |

Table S21: Identifiable parameter combinations in the full SOM model (with a collinearity index  $< 10$ ), for a calibration when data on the OC, N and  $\Delta^{14}\text{C}$  content of POM and MAOM are available. For each row, identifiable parameter combinations are marked with an 'X'. N is the number of identifiable parameters in the same row. Note that parameter combinations which are not identifiable are not shown.

| N    | Vmax.L | Vmax.R | KmN.L | KmN.R | KmU | KmAds | kdes | fK | collinearity |
|------|--------|--------|-------|-------|-----|-------|------|----|--------------|
| 2.00 | X      | X      |       |       |     |       |      |    | 2.91         |
| 2.00 | X      |        |       | X     |     |       |      |    | 2.89         |
| 2.00 | X      |        |       |       | X   |       |      |    | 1.48         |
| 2.00 | X      |        |       |       |     | X     |      |    | 1.40         |
| 2.00 | X      |        |       |       |     |       | X    |    | 1.10         |
| 2.00 | X      |        |       |       |     |       |      | X  | 1.26         |
| 2.00 |        | X      | X     |       |     |       |      |    | 2.91         |
| 2.00 |        | X      |       |       | X   |       |      |    | 1.22         |
| 2.00 |        | X      |       |       |     | X     |      |    | 1.21         |
| 2.00 |        | X      |       |       |     |       | X    |    | 1.06         |
| 2.00 |        | X      |       |       |     |       |      | X  | 1.44         |
| 2.00 |        |        | X     | X     |     |       |      |    | 2.89         |
| 2.00 |        |        | X     |       | X   |       |      |    | 1.48         |
| 2.00 |        |        | X     |       |     | X     |      |    | 1.40         |
| 2.00 |        |        | X     |       |     |       | X    |    | 1.10         |
| 2.00 |        |        | X     |       |     |       |      | X  | 1.26         |
| 2.00 |        |        |       | X     | X   |       |      |    | 1.22         |
| 2.00 |        |        |       | X     |     | X     |      |    | 1.21         |
| 2.00 |        |        |       | X     |     |       | X    |    | 1.06         |
| 2.00 |        |        |       | X     |     |       |      | X  | 1.44         |
| 2.00 |        |        |       |       | X   | X     |      |    | 6.24         |
| 2.00 |        |        |       |       | X   |       | X    |    | 1.25         |
| 2.00 |        |        |       |       | X   |       |      | X  | 1.52         |
| 2.00 |        |        |       |       |     | X     | X    |    | 1.25         |
| 2.00 |        |        |       |       |     | X     |      | X  | 1.53         |
| 2.00 |        |        |       |       |     |       | X    | X  | 1.15         |
| 3.00 | X      | X      |       |       | X   |       |      |    | 3.40         |
| 3.00 | X      | X      |       |       |     | X     |      |    | 3.21         |
| 3.00 | X      | X      |       |       |     |       | X    |    | 2.93         |

Table S21: continued

| N    | Vmax.L | Vmax.R | KmN.L | KmN.R | KmU | KmAds | kdes | fK | collinearity |
|------|--------|--------|-------|-------|-----|-------|------|----|--------------|
| 3.00 | X      | X      |       |       |     |       |      | X  | 3.12         |
| 3.00 | X      |        |       | X     | X   |       |      |    | 3.36         |
| 3.00 | X      |        |       | X     |     | X     |      |    | 3.18         |
| 3.00 | X      |        |       | X     |     |       | X    |    | 2.91         |
| 3.00 | X      |        |       | X     |     |       |      | X  | 3.09         |
| 3.00 | X      |        |       |       | X   | X     |      |    | 6.47         |
| 3.00 | X      |        |       |       | X   |       | X    |    | 1.55         |
| 3.00 | X      |        |       |       |     | X     | X    |    | 1.48         |
| 3.00 | X      |        |       |       |     | X     |      | X  | 5.33         |
| 3.00 | X      |        |       |       |     |       | X    | X  | 1.46         |
| 3.00 |        | X      | X     |       | X   |       |      |    | 3.40         |
| 3.00 |        | X      | X     |       |     | X     |      |    | 3.21         |
| 3.00 |        | X      | X     |       |     |       | X    |    | 2.93         |
| 3.00 |        | X      | X     |       |     |       |      | X  | 3.12         |
| 3.00 |        | X      |       |       | X   | X     |      |    | 6.26         |
| 3.00 |        | X      |       |       | X   |       | X    |    | 1.34         |
| 3.00 |        | X      |       |       | X   |       |      | X  | 4.55         |
| 3.00 |        | X      |       |       |     | X     | X    |    | 1.33         |
| 3.00 |        | X      |       |       |     | X     |      | X  | 4.40         |
| 3.00 |        | X      |       |       |     |       | X    | X  | 1.61         |
| 3.00 |        |        | X     | X     | X   |       |      |    | 3.36         |
| 3.00 |        |        | X     | X     |     | X     |      |    | 3.18         |
| 3.00 |        |        | X     | X     |     |       | X    |    | 2.91         |
| 3.00 |        |        | X     | X     |     |       |      | X  | 3.09         |
| 3.00 |        |        | X     |       | X   | X     |      |    | 6.47         |
| 3.00 |        |        | X     |       | X   |       | X    |    | 1.55         |
| 3.00 |        |        | X     |       |     | X     | X    |    | 1.48         |
| 3.00 |        |        | X     |       |     | X     |      | X  | 5.33         |
| 3.00 |        |        | X     |       |     |       | X    | X  | 1.46         |
| 3.00 |        |        |       | X     | X   | X     |      |    | 6.25         |
| 3.00 |        |        |       | X     | X   |       | X    |    | 1.34         |
| 3.00 |        |        |       | X     | X   |       |      | X  | 4.53         |

Table S21: continued

| N    | Vmax.L | Vmax.R | KmN.L | KmN.R | KmU | KmAds | kdes | fK | collinearity |
|------|--------|--------|-------|-------|-----|-------|------|----|--------------|
| 3.00 |        |        |       | X     |     | X     | X    |    | 1.33         |
| 3.00 |        |        |       | X     |     | X     |      | X  | 4.41         |
| 3.00 |        |        |       | X     |     |       | X    | X  | 1.61         |
| 3.00 |        |        |       |       | X   | X     | X    |    | 6.24         |
| 3.00 |        |        |       |       | X   | X     |      | X  | 6.24         |
| 3.00 |        |        |       |       | X   |       | X    | X  | 1.55         |
| 3.00 |        |        |       |       |     | X     | X    | X  | 1.57         |
| 4.00 | X      | X      |       |       | X   | X     |      |    | 7.04         |
| 4.00 | X      | X      |       |       | X   |       | X    |    | 3.40         |
| 4.00 | X      | X      |       |       |     | X     | X    |    | 3.22         |
| 4.00 | X      | X      |       |       |     | X     |      | X  | 5.63         |
| 4.00 | X      | X      |       |       |     |       | X    | X  | 3.12         |
| 4.00 | X      |        |       | X     | X   | X     |      |    | 7.07         |
| 4.00 | X      |        |       | X     | X   |       | X    |    | 3.37         |
| 4.00 | X      |        |       | X     |     | X     | X    |    | 3.18         |
| 4.00 | X      |        |       | X     |     | X     |      | X  | 5.66         |
| 4.00 | X      |        |       | X     |     |       | X    | X  | 3.09         |
| 4.00 | X      |        |       |       | X   | X     | X    |    | 6.47         |
| 4.00 | X      |        |       |       |     | X     | X    | X  | 5.33         |
| 4.00 |        | X      | X     |       | X   | X     |      |    | 7.04         |
| 4.00 |        | X      | X     |       | X   |       | X    |    | 3.40         |
| 4.00 |        | X      | X     |       |     | X     | X    |    | 3.22         |
| 4.00 |        | X      | X     |       |     | X     |      | X  | 5.62         |
| 4.00 |        | X      | X     |       |     |       | X    | X  | 3.12         |
| 4.00 |        | X      |       |       | X   | X     | X    |    | 6.26         |
| 4.00 |        | X      |       |       | X   | X     |      | X  | 6.27         |
| 4.00 |        | X      |       |       | X   |       | X    | X  | 4.55         |
| 4.00 |        | X      |       |       |     | X     | X    | X  | 4.40         |
| 4.00 |        |        | X     | X     | X   | X     |      |    | 7.07         |
| 4.00 |        |        | X     | X     | X   |       | X    |    | 3.37         |
| 4.00 |        |        | X     | X     |     | X     | X    |    | 3.18         |
| 4.00 |        |        | X     | X     |     | X     |      | X  | 5.66         |

Table S21: continued

| N    | Vmax.L | Vmax.R | KmN.L | KmN.R | KmU | KmAds | kdes | fK | collinearity |
|------|--------|--------|-------|-------|-----|-------|------|----|--------------|
| 4.00 |        |        | X     | X     |     |       | X    | X  | 3.09         |
| 4.00 |        |        | X     |       | X   | X     | X    |    | 6.47         |
| 4.00 |        |        | X     |       |     | X     | X    | X  | 5.33         |
| 4.00 |        |        |       | X     | X   | X     | X    |    | 6.25         |
| 4.00 |        |        |       | X     | X   | X     |      | X  | 6.26         |
| 4.00 |        |        |       | X     | X   |       | X    | X  | 4.53         |
| 4.00 |        |        |       | X     |     | X     | X    | X  | 4.41         |
| 4.00 |        |        |       |       | X   | X     | X    | X  | 6.24         |
| 5.00 | X      | X      |       |       | X   | X     | X    |    | 7.04         |
| 5.00 | X      | X      |       |       |     | X     | X    | X  | 5.63         |
| 5.00 | X      |        |       | X     | X   | X     | X    |    | 7.07         |
| 5.00 | X      |        |       | X     |     | X     | X    | X  | 5.66         |
| 5.00 |        | X      | X     |       | X   | X     | X    |    | 7.04         |
| 5.00 |        | X      | X     |       |     | X     | X    | X  | 5.63         |
| 5.00 |        | X      |       |       | X   | X     | X    | X  | 6.28         |
| 5.00 |        |        | X     | X     | X   | X     | X    |    | 7.07         |
| 5.00 |        |        | X     | X     |     | X     | X    | X  | 5.66         |
| 5.00 |        |        |       | X     | X   | X     | X    | X  | 6.26         |

## References

- Brun, R., Reichert, P., and Künsch, H. R.: Practical identifiability analysis of large environmental simulation models, *Water Resources Research*, 37, 1015–1030, <https://doi.org/10.1029/2000WR900350>, [\\_eprint: https://onlinelibrary.wiley.com/doi/pdf/10.1029/2000WR900350](https://onlinelibrary.wiley.com/doi/pdf/10.1029/2000WR900350), 2001.
- 10 Wutzler, T., Yu, L., Schrumf, M., and Zaehle, S.: Simulating long-term responses of soil organic matter turnover to substrate stoichiometry by abstracting fast and small-scale microbial processes: the Soil Enzyme Steady Allocation Model (SESAM; v3.0), *Geoscientific Model Development*, 15, 8377–8393, <https://doi.org/10.5194/gmd-15-8377-2022>, publisher: Copernicus GmbH, 2022.
